# Supplementary material for: Severe idiopathic pulmonary fibrosis: what can be done?
Source: PubMed Central journal article supplement — Eur Respir Rev. 2017 Sep 27;26(145):170047. doi: 10.1183/16000617.0047-2017 (PMC9488930; doi:10.1183/16000617.0047-2017), 2017-09-27
Supplement: ERR-0047-2017_Caminati.pdf [file ERR-0047-2017_Caminati.pdf]

To view the full contents of this document, you need a later version of the PDF viewer. You can upgrade to the latest version of Adobe Reader from [www.adobe.com/products/acrobat/readstep2.html](http://www.adobe.com/products/acrobat/readstep2.html)

For further support, go to [www.adobe.com/support/products/acrreader.html](http://www.adobe.com/support/products/acrreader.html)
